# Supplementary material for: Social tagging in the life sciences: characterizing a new metadata resource for bioinformatics
Source: Springer Nature journal article supplement (doi:10.1186/1471-2105-10-313), 2009-09-25

Log N citations

8

6

4

2

0

0.0

0.5

1.0

1.5

2.0

2.5

3.0

3.5

Log N posts

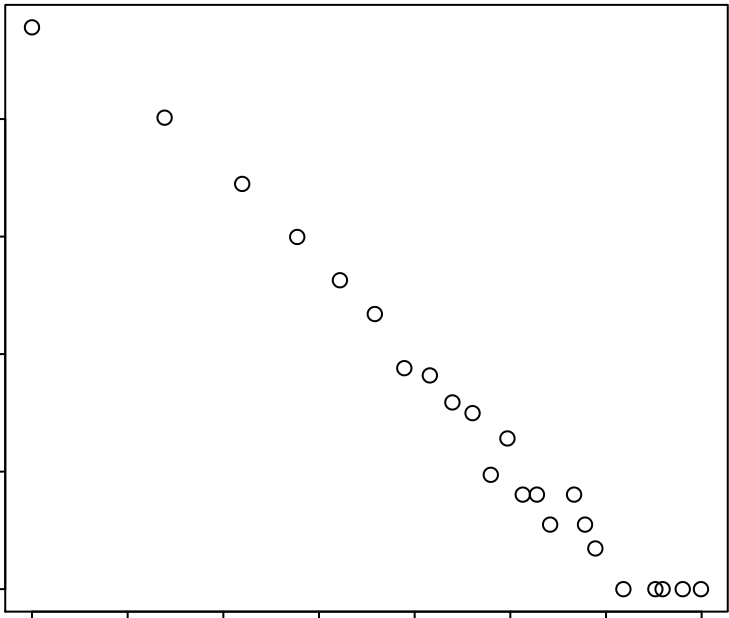

Supplement: 12859_2009_3043_MOESM7_ESM.pdf [file 12859_2009_3043_MOESM7_ESM.pdf]
