# Supplementary material for: Social tagging in the life sciences: characterizing a new metadata resource for bioinformatics
Source: Springer Nature journal article supplement (doi:10.1186/1471-2105-10-313), 2009-09-25

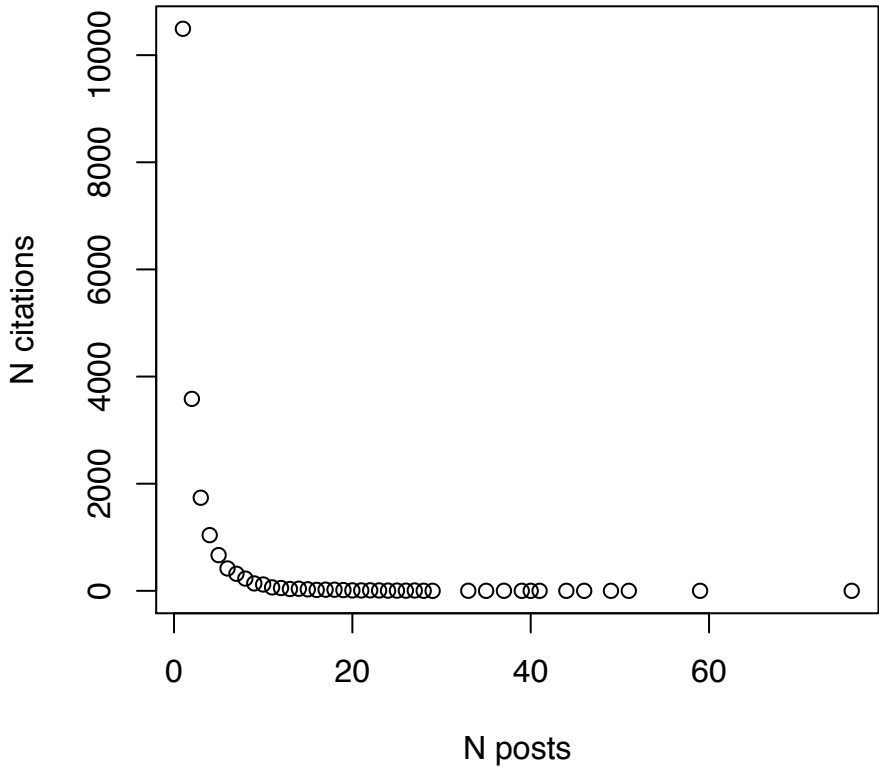

Supplement: 12859_2009_3043_MOESM8_ESM.pdf [file 12859_2009_3043_MOESM8_ESM.pdf]
